# Supplementary material for: Erasable thin-film optical diode based on a photoresponsive liquid crystal polymer
Source: Royal Society of Chemistry journal article supplement (doi:10.1039/c3nr06623a), 2014-01-01
Supplement: c3nr06623a.pdf [file c3nr06623a.pdf]

## Supporting information

# Erased thin-film optical diode based on a photoresponsive liquid crystal polymer

Xinping Zhang,<sup>\*a</sup> Jian Zhang,<sup>a</sup> Yujian Sun,<sup>bc</sup> Huai Yang,<sup>\*d</sup> and Haifeng Yu<sup>\*d</sup>

<sup>a</sup>*Institute of Information Photonics Technology and College of Applied Sciences, Beijing University of Technology, Beijing 100124, P. R. China*

<sup>b</sup>*Anshan Normal University, Anshan 114005, Liaoning, China*

<sup>c</sup>*School of Materials Science and Engineering, University of Science and Technology Beijing, Beijing 10083, China*

<sup>d</sup>*Department of Materials Science and Engineering, College of Engineering, Peking University, Beijing 100871, P. R. China*

\*Emails: [zhangxinping@bjut.edu.cn](mailto:zhangxinping@bjut.edu.cn), [yanghuai@coe.pku.edu.cn](mailto:yanghuai@coe.pku.edu.cn), [yuhai@pku.edu.cn](mailto:yuhai@pku.edu.cn)

The DSC measurements on the LCP is shown in Fig. S1, which shows a glass-transition temperature of about 82 °C and a clearing point at about 139 °C.

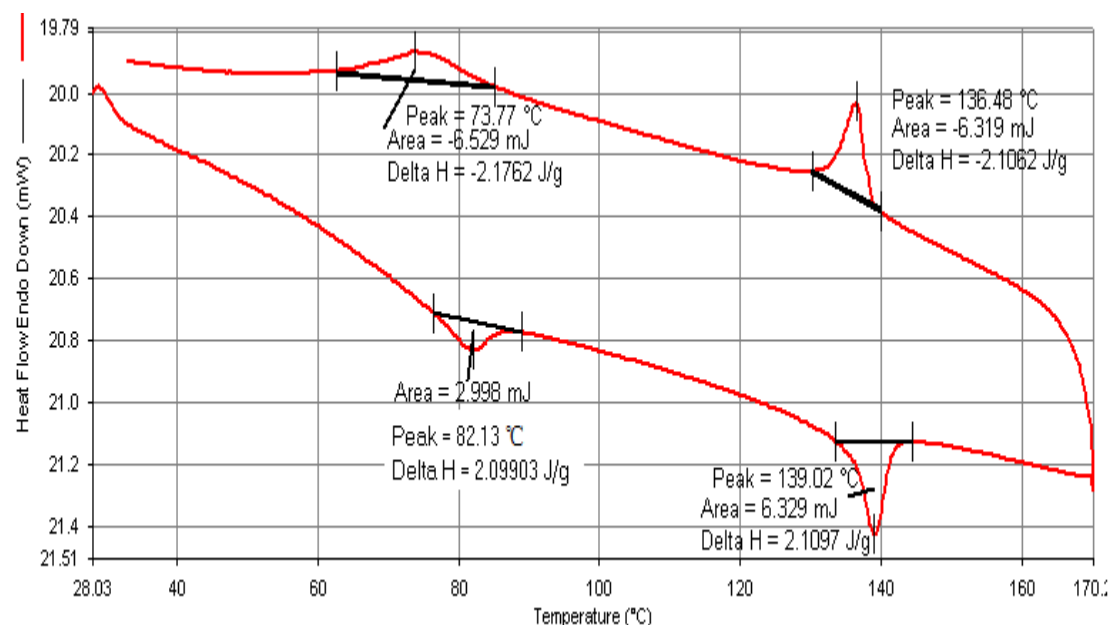

Fig. S1 The DSC measurements on the LCP.
